# Supplementary material for: Hydrophilicity Improvement of Polymer Surfaces Induced by Simultaneous Nuclear Transmutation and Oxidation Effects Using High-Energy and Low-Fluence Helium Ion Beam Irradiation
Source: PubMed Central journal article supplement (PMC7761050; doi:10.3390/polym12122770), 2020-11-24
Supplement: polymers-12-02770-s001.pdf [file polymers-12-02770-s001.pdf]

# Supplementary Materials

for

## Hydrophilicity improvement of polymer surfaces induced by simultaneous nuclear transmutation and oxidation effects using high-energy and low-fluence helium ion beam irradiation

*Jung Woo Kim<sup>1,2</sup>, Seung Hwa Yoo<sup>3\*</sup>, Young Bae Kong<sup>1</sup>, Sung Oh Cho<sup>2</sup>, Eun Je Lee<sup>1\*</sup>*

<sup>1</sup>Advanced Radiation Technology Institute, Korea Atomic Energy Research Institute, 29 Geunggil, Jeongeup-si, Jeollabuk-do 56212, Republic of Korea

<sup>2</sup>Department of Nuclear and Quantum Engineering, Korea Advanced Institute of Science and Technology, 291 Daehak-ro, Yuseong-gu, Daejeon, 34141 Republic of Korea

<sup>3</sup>Department of Quantum System Engineering, College of Engineering, Jeonbuk National University, Jeonju, 567 Republic of Korea

---

\* Corresponding author. E-mail: leeeunje@kaeri.re.kr (Eun Je Lee)

\* Corresponding author. E-mail: seunghwayoo@jbnu.ac.kr (Seung Hwa Yoo)

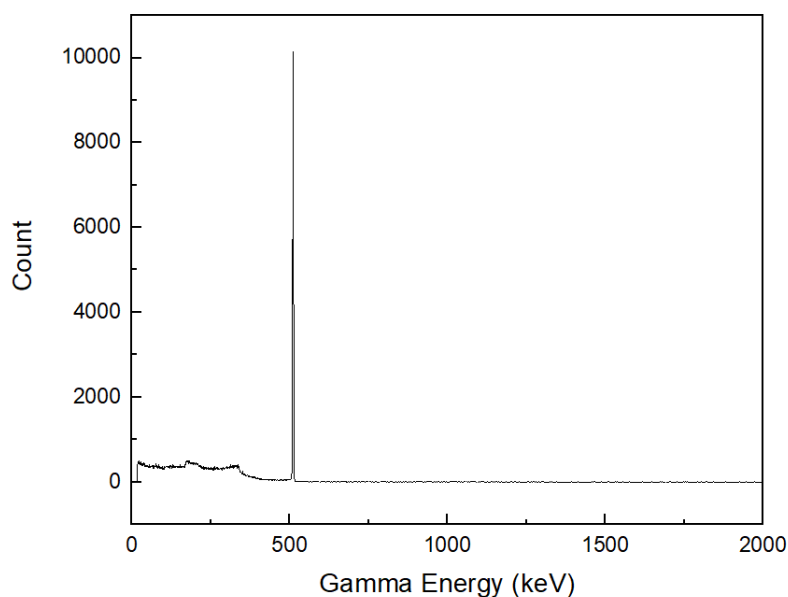

Figure S1. Measured gamma spectrum of polymer irradiated with 20 MeV helium ion beam.

Figure S1 shows the gamma spectrum of the irradiated polymer. A strong single peak centered at 511 keV was observed, which corresponds to the annihilation radiation (two 511 keV photons emitted in opposite directions) originating from the recombination of an electron ( $\beta^-$ ) and positron ( $\beta^+$ ). As discussed in the manuscript, positron-emitting nuclei (O-15) are formed by nuclear reaction (#1 and #5), and this radioisotope decays to a stable isotope (N-15). This decay process generates  $\beta^+$ , which subsequently recombine with electrons to finally emit two 511 keV photons. Therefore, the measured gamma spectrum is strong evidence that C-12 was transformed to O-15 and subsequently to N-15.
